# Supplementary material
Source: PubMed Central journal article supplement (PMC4012481)
Supplement: 4273c6de679685facbb650b956dfdd1d_genetics.114.162917-2.pdf [file 4273c6de679685facbb650b956dfdd1d_genetics.114.162917-2.pdf]

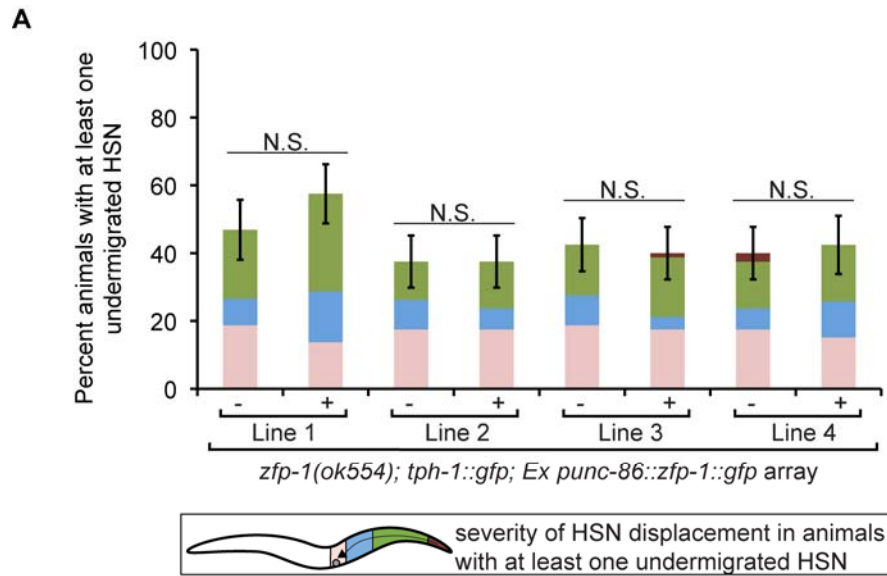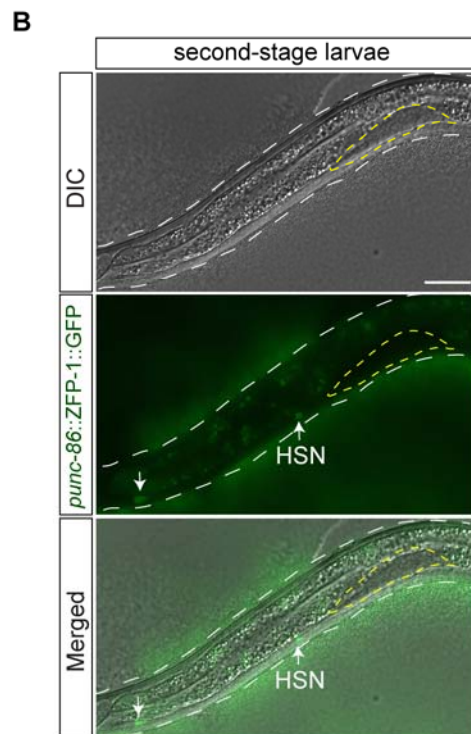

**Figure S2** ZFP-1 may function nonautonomously to promote HSN migration. (A) Expression of ZFP-1::GFP in the HSN does not rescue the HSN undermigration defect of *zfp-1(ok554)* mutants. The *zfp-1(ok554)* mutants that had the transgenic array (+) or their siblings that had lost the array (-) were scored. Number of animals scored per line are: Line 1: (-) n=32 and (+) n=40; Line 2: (-) n=40 and (+) n=40; Line 3: (-) n=40 and (+) n=40; Line 4: (-) n=40 and (+) n=33. HSNs were visualized with a *tph-1::gfp* reporter. See Figure S1 for detailed description of worm schematic legend. The z-test was used to determine significance. Error bars represent SEP. (B) ZFP-1::GFP driven by the *unc-86* promoter is expressed in a subset of neurons, including the HSN, in *zfp-1(ok554)*. The dotted yellow line represents the developing gonad. The HSN is indicated by an arrow and a second arrow in the tail illustrates a tail neuron, which also expresses ZFP-1::GFP.
